# Supplementary material for: Seroprevalence and Risk Factors of Inkoo Virus in Northern Sweden
Source: PubMed Central journal article supplement (PMC4856611; doi:10.4269/ajtmh.15-0270), 2016-05-04
Supplement: SD3.pdf [file SD3.pdf]

## SUPPLEMENTAL APPENDIX 1

### VARIABLE SPECIFICATION PROCEDURES

Because there were many water, sanitation, and hygiene (WaSH) technologies and behaviors of interest, we used a number of guiding criterion during the variable specification and model specification.

We first aggregated variables to the correct levels based on causal hypotheses of how they might affect the outcome. Some variables were collected at the pupil level, although they were intrinsically school-level variables, and were therefore aggregated to the school level.

We assessed the homogeneity of variables to see if they have enough variation to be included in the analyses. We also assessed that there were sufficient numbers in cells of categorical variables, and when we observed small cell counts, we considered the possibility of combining similar categories to resolve the problem. We had originally considered the possibility of herd protection from some variables, including school handwashing, school sanitation, and community sanitation. That is, we allow for the possibility that pupils' *Ascaris lumbricoides* infection may be affected through group-level adherence, even in the absence of individual-level adherence. When considering the school-level handwashing variable, in 44 of the 51 schools, fewer than 10% of the pupils reported always washing their hands after defecation. For sanitation variables, almost all pupils reported always using a latrine for defecation at both school and home. Because heterogeneity was poor, we were unable to assess herd protection as originally intended.

Although access to WaSH is important, we generally assumed that pupils' helminth infection could be affected only through the use of WaSH and not through access alone. For example, the presence of a handwashing station can only affect pupil health through handwashing.

Our primary exposures of interest were access to an improved water source, access to comprehensive sanitation (captured by several variables), and practice of handwashing, with separate variables for each of these primary exposures

at both school and at home. We also had interest in several other WaSH technologies and behaviors. We attempted to control for a number of important confounders, and to include relevant interactions between variables. The inclusion of each variable was chosen a priori based on biological plausibility and on the previous literature. Sometimes separate variables measured similar constructs, and in Supplemental Table 1 we show correlations between these variables, and the reasons why we chose to include specific variables in our models. We also assessed collinearity of variables in the full model and eliminated terms that were collinear (measured by the presence of high condition indices with several high variance decomposition proportions).<sup>1</sup> Further details on each variable of interest are also discussed in the article.

It was initially unclear whether or not we should control for the prevalence of *A. lumbricoides* at baseline, as we hypothesized that it could act as either an intermediate variable or a confounding variable. We therefore used a data-driven approach, and ran two separate adjusted models, with and without the “baseline *A. lumbricoides* prevalence” variable, comparing the change in the coefficients from the model for each of the WaSH variables between the reduced and full model. The two models gave generally similar results (both the point estimates and variances), indicating minimal confounding due to this variable. Only the estimate for one variable—the % of ventilated improved pit latrines in school—was > 10% different from the fully adjusted estimate, but we believed this was more likely to be an intermediate. For this reason, we do not control for the baseline prevalence of *A. lumbricoides* in our article.

### REFERENCES

1. Kleinbaum DG, Klein M, 2010. *Logistic Regression: A Self-Learning Text*. New York, NY: Springer.
2. Vyas S, Kumaranayake L, 2006. Constructing socio-economic status indices: how to use principal components analysis. *Health Policy Plan 21*: 459–468.
3. Mokken RJ, 1971. *A Theory and Procedure of Scale Analysis: With Applications in Political Research*. The Hague, The Netherlands: Mouton.

SUPPLEMENTAL TABLE 1  
Variable specification procedures

| Variables                                                                                   | Type             | Level                      | Included                                      | Variable notes                                                                                                                                                                                                                                                                                                                                                                                                                                                                                                                                            |
|---------------------------------------------------------------------------------------------|------------------|----------------------------|-----------------------------------------------|-----------------------------------------------------------------------------------------------------------------------------------------------------------------------------------------------------------------------------------------------------------------------------------------------------------------------------------------------------------------------------------------------------------------------------------------------------------------------------------------------------------------------------------------------------------|
| School hygiene                                                                              |                  |                            |                                               |                                                                                                                                                                                                                                                                                                                                                                                                                                                                                                                                                           |
| School provides a handwashing place                                                         | Pupil reported   | Aggregated to school level | No, only adherence is relevant                | Handwashing only functions through adherence, so having access alone was not important to our models.                                                                                                                                                                                                                                                                                                                                                                                                                                                     |
| Water always available at that place                                                        | Pupil reported   | Aggregated to school level | No, only adherence is relevant                | We considered a Mokken scale for all of these variables, and they were highly scalable: Loevinger's $H$ coefficient = 0.70.* However, the scale overemphasized access and underemphasized actual adherence.                                                                                                                                                                                                                                                                                                                                               |
| Soap always available at that place                                                         | Pupil reported   | Aggregated to school level | No, only adherence is relevant                | The correlation coefficient between last handwashing and always handwashing was 0.45 ( $P < 0.01$ ). We used the always handwashing variable in our primary analysis as it represented the public health ideal, but we used the last handwashing variable in a sensitivity analysis as it is less prone to recall bias†                                                                                                                                                                                                                                   |
| Handwashed with soap and water the last time they defecated                                 | Pupil reported   | Pupil level                | Yes                                           | We had originally considered the possibility of group-level, or herd protection. However, handwashing was poor at most schools (see Table 3), so the variable lacked the necessary heterogeneity to be able to include in our multivariable models                                                                                                                                                                                                                                                                                                        |
| Always handwash with soap and water after defecating                                        | Pupil reported   | Pupil level                | Yes                                           |                                                                                                                                                                                                                                                                                                                                                                                                                                                                                                                                                           |
| Handwashed with soap and water the last time they defecated (same as above, but aggregated) | Pupil reported   | Aggregated to school level | No, homogenous                                |                                                                                                                                                                                                                                                                                                                                                                                                                                                                                                                                                           |
| Always handwash with soap and water after defecating (same as above, but aggregated)        | Pupil reported   | Aggregated to school level | No, homogenous                                |                                                                                                                                                                                                                                                                                                                                                                                                                                                                                                                                                           |
| Handwashing facilities near the toilets                                                     | Observed         | School level               | No, only adherence to handwashing is relevant | We assumed that access to handwashing supplies could only improve health through actual use (i.e., washing ones hands). These variables assessing access alone were therefore not included in our models                                                                                                                                                                                                                                                                                                                                                  |
| Water in handwashing facilities                                                             | Observed         | School level               | No, only adherence to handwashing is relevant |                                                                                                                                                                                                                                                                                                                                                                                                                                                                                                                                                           |
| Soap available at the handwashing facilities                                                | Observed         | School level               | No, only adherence to handwashing is relevant |                                                                                                                                                                                                                                                                                                                                                                                                                                                                                                                                                           |
| School water                                                                                |                  |                            |                                               |                                                                                                                                                                                                                                                                                                                                                                                                                                                                                                                                                           |
| Water always available for drinking                                                         | Pupil reported   | Aggregated to school level | No, redundant                                 | Pupil-reported water availability and teacher-reported availability were measured with different questions; the correlation coefficient between these original continuous variables was 0.35 ( $P < 0.01$ ). We believed the teacher reported value would be less prone to reporting errors, and so we used a categorized version of this variable (always available vs. not). For our primary analysis, we collapsed this variable with the improved water source variable. We used the other variables with similar constructs in sensitivity analyses‡ |
| Improved water source for drinking‡                                                         | Observed         | School level               | No, redundant                                 |                                                                                                                                                                                                                                                                                                                                                                                                                                                                                                                                                           |
| Drinking water is reliably available                                                        | Teacher reported | School level               | No, redundant                                 |                                                                                                                                                                                                                                                                                                                                                                                                                                                                                                                                                           |
| Improved water source that reliably supplied water                                          | Multiple sources | School level               | Yes                                           |                                                                                                                                                                                                                                                                                                                                                                                                                                                                                                                                                           |
| School sanitation                                                                           |                  |                            |                                               |                                                                                                                                                                                                                                                                                                                                                                                                                                                                                                                                                           |
| Usually defecate in the latrine/toilet at school                                            | Pupil reported   | Aggregated to school level | No, homogenous, redundant                     | The construct we wanted to measure was contamination by open defecation at the school. Many of these variables were too homogenous to use. We used the observed variable (i.e., whether there were feces visible on the grounds), as it was sufficiently heterogeneous and was the most direct measure                                                                                                                                                                                                                                                    |
| Used a latrine/toilet at school last time they defecated                                    | Pupil reported   | Aggregated to school level | No, homogenous, redundant                     |                                                                                                                                                                                                                                                                                                                                                                                                                                                                                                                                                           |
| Think their friends always defecate in the latrine/toilet at school                         | Pupil reported   | Aggregated to school level | No, redundant                                 |                                                                                                                                                                                                                                                                                                                                                                                                                                                                                                                                                           |
| Feces visible on grounds outside the latrines                                               | Observed         | School level               | Yes                                           |                                                                                                                                                                                                                                                                                                                                                                                                                                                                                                                                                           |

(continued)

SUPPLEMENTAL TABLE 1  
Continued

| Variables                                                   | Type           | Level        | Included                                      | Variable notes                                                                                                                                                                                                                                                                                                                                                                                                            |
|-------------------------------------------------------------|----------------|--------------|-----------------------------------------------|---------------------------------------------------------------------------------------------------------------------------------------------------------------------------------------------------------------------------------------------------------------------------------------------------------------------------------------------------------------------------------------------------------------------------|
| Meets the WHO pupil to latrine ratio standards for girls    | Observed       | School level | Yes                                           | This was derived from the pupil to latrine ratio variable                                                                                                                                                                                                                                                                                                                                                                 |
| Meets the WHO pupil to latrine ratio standards for boys     | Observed       | School level | Yes                                           | This was derived from the pupil to latrine ratio variable                                                                                                                                                                                                                                                                                                                                                                 |
| Latrines clean at school                                    | Observed       | School level | No, redundant                                 | These are intrinsically a latrine-level variables, but latrine-level analyses were not possible for our study. The correlation coefficient between these variables was $-0.93$ ( $P < 0.01$ ). We used the visible feces variable as it was more relevant to the fecal-oral transmission mechanism. The variable was defined as the percentage of latrines in the school with no visible feces inside any of the latrines |
| Feces visible in latrines at school                         | Observed       | School level | Yes                                           |                                                                                                                                                                                                                                                                                                                                                                                                                           |
| Anal cleansing at school                                    | Pupil reported | Pupil level  | Yes                                           | This variable was recategorized as a three-level variable (water vs. leaves/rocks/nothing vs. nothing) due to small cell counts                                                                                                                                                                                                                                                                                           |
| Home hygiene                                                |                |              |                                               |                                                                                                                                                                                                                                                                                                                                                                                                                           |
| Have a handwashing place                                    | Pupil reported | Pupil level  | No, only adherence to handwashing is relevant | Handwashing only functions through adherence, so having access alone was not important to our models. We considered a Mokken scale for all of these variables, and they were highly scalable: Loevinger's $H$ coefficient = $0.77$ .*                                                                                                                                                                                     |
| Water always available at that place                        | Pupil reported | Pupil level  | No, only adherence to handwashing is relevant | However, the scale overemphasized access and underemphasized actual adherence. The correlation coefficient between last handwashing and always handwashing was $0.29$ ( $P < 0.01$ ). We used the always handwashing variable in our primary analysis as it represented the public health ideal, but we used the last handwashing variable in a sensitivity analysis as it is less prone to recall bias†                  |
| Soap always available at that place                         | Pupil reported | Pupil level  | No, only adherence to handwashing is relevant |                                                                                                                                                                                                                                                                                                                                                                                                                           |
| Handwashed with soap and water the last time they defecated | Pupil reported | Pupil level  | No, redundant                                 |                                                                                                                                                                                                                                                                                                                                                                                                                           |
| Always handwash with soap and water after defecating        | Pupil reported | Pupil level  | Yes                                           |                                                                                                                                                                                                                                                                                                                                                                                                                           |
| Home water                                                  |                |              |                                               |                                                                                                                                                                                                                                                                                                                                                                                                                           |
| Have an improved water source for drinking                  | Pupil reported | Pupil level  | Yes                                           | We used the improved water source variable. Pupils reported that water was generally available for drinking at home                                                                                                                                                                                                                                                                                                       |
| Water always available for drinking                         | Pupil reported | Pupil level  | No, homogenous                                |                                                                                                                                                                                                                                                                                                                                                                                                                           |
| Home sanitation                                             |                |              |                                               |                                                                                                                                                                                                                                                                                                                                                                                                                           |
| Have personal toilet/latrine in home                        | Pupil reported | Pupil level  | Yes                                           | This variable was collected using two different questions and was later categorized into a single variable (personal vs. shared vs. none)                                                                                                                                                                                                                                                                                 |
| Have shared toilet/latrine in home                          | Pupil reported | Pupil level  | Yes                                           |                                                                                                                                                                                                                                                                                                                                                                                                                           |
| No toilet/latrine in home                                   | Pupil reported | Pupil level  | No, homogenous                                | These both measured a similar construct, but were very homogenous, so we did not use either of them                                                                                                                                                                                                                                                                                                                       |
| Usually defecate in the latrine/toilet at home              | Pupil reported | Pupil level  | No, homogenous                                |                                                                                                                                                                                                                                                                                                                                                                                                                           |
| Used a latrine/toilet at home last time they defecated      | Pupil reported | Pupil level  | No, homogenous                                |                                                                                                                                                                                                                                                                                                                                                                                                                           |
| Anal cleansing at home                                      | Pupil reported | Pupil level  | Yes                                           | This variable was recategorized as a three-level variable (water vs. leaves/rocks/nothing vs. nothing) due to small cell counts                                                                                                                                                                                                                                                                                           |
| Other WaSH variables                                        |                |              |                                               |                                                                                                                                                                                                                                                                                                                                                                                                                           |
| Shoe wearing                                                | Observed       | Pupil level  | Yes                                           | This variable was observed, but may not reflect long-term shoe wearing behavior                                                                                                                                                                                                                                                                                                                                           |
| Type of floor in home                                       | Pupil reported | Pupil level  | Yes                                           | This variable was recategorized as a binary variable (earth/sand vs. cement/wood/iron sheets) due to small cell counts                                                                                                                                                                                                                                                                                                    |
| Student eats soil (geophagy)                                | Pupil reported | Pupil level  | Yes                                           | This was a binary variable (yes vs. no), and may not reflect long-term practices                                                                                                                                                                                                                                                                                                                                          |

(continued)

SUPPLEMENTAL TABLE 1  
Continued

| Variables                                       | Type              | Level                      | Included | Variable notes                                                                                                           |
|-------------------------------------------------|-------------------|----------------------------|----------|--------------------------------------------------------------------------------------------------------------------------|
| Confounders                                     |                   |                            |          |                                                                                                                          |
| Grade                                           | Pupil reported    | Pupil level                | Yes      | Categorical variables, grades 2–6                                                                                        |
| Sex                                             | Observed uniforms | Pupil level                | Yes      | Male vs. female                                                                                                          |
| Siblings under age 5                            | Pupil reported    | Pupil level                | Yes      | This count variable was recategorized as a binary variable (yes vs. no)                                                  |
| Wealth score                                    | Pupil reported    | Pupil level                | Yes      | This variable was derived from many different household asset variables, using principal component analysis <sup>2</sup> |
| Baseline <i>Ascaris lumbricoides</i> prevalence | Measured          | Aggregated to school level | No       | Pupil STH infection was measured at the baseline visit                                                                   |
| Mean annual temperature                         | Measured          | School level               | Yes      | Linked to school locations from <a href="http://www.worldclim.org/bioclim">http://www.worldclim.org/bioclim</a>          |
| Annual precipitation                            | Measured          | School level               | Yes      | This was used as a proxy of geography. Former province was                                                               |
| Province                                        | Observed          | Province level             | Yes      | used instead of district because of the large number of districts in our study                                           |

STH = soil-transmitted helminth.

\* Mokken suggested that a Loevinger's  $H$  coefficient of  $\geq 0.5$  denoted a strong scale.<sup>3</sup>

† We found similar results in unadjusted analyses that used the “last handwash” variables, instead of the “always handwash” variables. Pupils who reported washing their hands after they last defecated at school had an odds ratio (OR) of 0.75 (95% confidence interval [CI]: 0.54–1.06;  $P = 0.10$ ), and for washing their hands after they last defecated at home the OR was 0.94 (95% CI: 0.69–1.28;  $P = 0.68$ ).

‡ The unadjusted analysis assessing the association between an improved water source at school and *A. lumbricoides* showed a stronger association (OR: 0.40, 95% CI: 0.18–0.87;  $P = 0.02$ ) than the analysis that instead used the definition of an improved source that reliably supplied water (OR: 1.14, 95% CI: 0.58–2.21;  $P = 0.071$ ).

SUPPLEMENTAL APPENDIX 2

SUPPLEMENTAL TABLE 2

Unadjusted ORs\* comparing WaSH and *Ascaris lumbricoides*, *Trichuris trichiura*, and hookworm infection

|                                                       | <i>A. lumbricoides</i> |          | <i>T. trichiura</i> |          | Hookworm         |          |
|-------------------------------------------------------|------------------------|----------|---------------------|----------|------------------|----------|
|                                                       | OR (95% CI)            | <i>P</i> | OR (95% CI)         | <i>P</i> | OR (95% CI)      | <i>P</i> |
| <b>School WaSH variables</b>                          |                        |          |                     |          |                  |          |
| Always handwashed after defecation                    |                        |          |                     |          |                  |          |
| Yes                                                   | 0.59 (0.35–1.01)       | 0.05     | 1.17 (0.53–2.55)    | 0.70     | 1.51 (0.67–3.4)  | 0.32     |
| No                                                    | Referent               |          | Referent            |          | Referent         |          |
| Improved water source that reliably supplied water    |                        |          |                     |          |                  |          |
| Yes                                                   | 1.14 (0.58–2.21)       | 0.71     | 1.42 (0.47–4.36)    | 0.54     | 1.91 (0.66–5.57) | 0.23     |
| No                                                    | Referent               |          | Referent            |          | Referent         |          |
| Pupil to latrine ratio acceptable                     |                        |          |                     |          |                  |          |
| Yes                                                   | 1.89 (1.22–2.91)       | < 0.01   | 0.75 (0.32–1.74)    | 0.5      | 0.63 (0.18–2.23) | 0.48     |
| No                                                    | Referent               |          | Referent            |          | Referent         |          |
| Percent of latrines with visible feces on floor/walls |                        |          |                     |          |                  |          |
| All latrines have feces                               | 1.26 (0.44–3.62)       | 0.67     | 1.24 (0.22–7.11)    | 0.81     | 0.23 (0.04–1.24) | 0.09     |
| No latrines have feces                                | Referent               |          | Referent            |          | Referent         |          |
| Percent of latrines that were VIP at school           |                        |          |                     |          |                  |          |
| All latrines were VIP                                 | 0.45 (0.21–0.96)       | 0.04     | 0.84 (0.22–3.22)    | 0.8      | 0.99 (0.28–3.52) | 0.98     |
| No latrines were VIP                                  | Referent               |          | Referent            |          | Referent         |          |
| Feces visible outside latrines                        |                        |          |                     |          |                  |          |
| Yes                                                   | 1.48 (0.73–2.98)       | 0.28     | 1.36 (0.41–4.45)    | 0.62     | 1.23 (0.4–3.77)  | 0.72     |
| No                                                    | Referent               |          | Referent            |          | Referent         |          |
| Anal cleansing with                                   |                        |          |                     |          |                  |          |
| Water                                                 | 1.04 (0.62–1.75)       | 0.89     | 0.85 (0.28–2.61)    | 0.77     | 1.93 (0.71–5.25) | 0.20     |
| Leaves/rocks/nothing                                  | Referent               |          | Referent            |          | Referent         |          |
| Paper product                                         | 1.01 (0.80–1.28)       | 0.93     | 0.83 (0.54–1.27)    | 0.38     | 0.88 (0.46–1.67) | 0.69     |
| <b>Home WaSH variables</b>                            |                        |          |                     |          |                  |          |
| Always handwashed after defecation                    |                        |          |                     |          |                  |          |
| Yes                                                   | 0.94 (0.69–1.28)       | 0.68     | 1.5 (0.89–2.52)     | 0.13     | 1.59 (0.89–2.82) | 0.12     |
| No                                                    | Referent               |          | Referent            |          | Referent         |          |
| Improved water source                                 |                        |          |                     |          |                  |          |
| Yes                                                   | 0.94 (0.77–1.16)       | 0.58     | 1.19 (0.82–1.74)    | 0.36     | 1.41 (0.87–2.28) | 0.16     |
| No                                                    | Referent               |          | Referent            |          | Referent         |          |
| Toilet                                                |                        |          |                     |          |                  |          |
| Shared                                                | 1.06 (0.86–1.32)       | 0.58     | 1.09 (0.74–1.6)     | 0.67     | Did not converge |          |
| No toilet                                             | 0.99 (0.57–1.69)       | 0.96     | 0.70 (0.34–1.44)    | 0.33     | Did not converge |          |
| Personal                                              | Referent               |          | Referent            |          | Referent         |          |
| Anal cleansing with                                   |                        |          |                     |          |                  |          |
| Water                                                 | 1.23 (0.77–1.98)       | 0.38     | 0.81 (0.28–2.33)    | 0.69     | 2.1 (0.94–4.71)  | 0.94     |
| Leaves/rocks/nothing                                  | Referent               |          | Referent            |          | Referent         |          |
| Paper product                                         | 0.91 (0.74–1.11)       | 0.34     | 1.01 (0.7–1.47)     | 0.28     | 0.76 (0.46–1.27) | 0.46     |
| <b>Other WaSH variables</b>                           |                        |          |                     |          |                  |          |
| Shoe wearing                                          |                        |          |                     |          |                  |          |
| Closed shoes                                          | 0.60 (0.48–0.74)       | < 0.01   | 0.73 (0.5–1.08)     | 0.12     | 0.41 (0.24–0.71) | 0.24     |
| Sandals                                               | 0.58 (0.45–0.74)       | < 0.01   | 0.57 (0.36–0.9)     | 0.02     | 0.55 (0.3–1)     | 0.30     |
| No shoes                                              | Referent               |          | Referent            |          | Referent         |          |
| Type of floor in home                                 |                        |          |                     |          |                  |          |
| Earth/sand                                            | 1.28 (1.02–1.62)       | 0.04     | 1.18 (0.79–1.77)    | 0.4      | 1.20 (0.62–2.34) | 0.62     |
| Cement/wood/iron sheets                               | Referent               |          | Referent            |          | Referent         |          |
| Student eats soil (geophagy)†                         |                        |          |                     |          |                  |          |
| Yes                                                   | 1.14 (0.82–1.58)       | 0.45     | 0.51 (0.26–0.98)    | 0.04     | 1.69 (0.79–3.61) | 0.79     |
| No                                                    | Referent               |          | Referent            |          | Referent         |          |

CI = confidence intervals; OR = odds ratio; WaSH = water, sanitation, and hygiene; VIP = ventilated improved pit latrine.

\*Models accounted for clustering of pupils within schools.

†A soil eating practice common in Kenya.<sup>29</sup>

SUPPLEMENTAL APPENDIX 3

SUPPLEMENTAL TABLE 3

ORs showing interaction between pupil handwashing and type of water source among 4,404 pupils attending 51 Kenyan primary schools

|                                      | Improved water source†                 | Unimproved water source            | <i>P</i> assessing interaction |
|--------------------------------------|----------------------------------------|------------------------------------|--------------------------------|
|                                      | OR (95% CI)                            | OR (95% CI)                        |                                |
| <b>Sensitivity analysis model 1*</b> |                                        |                                    |                                |
| Last handwashed at school†           | 0.66 (0.43–1.03); <i>P</i> = 0.07      | 1.06 (0.58–1.91); <i>P</i> = 0.86  | 0.21                           |
| Last handwashed at home              | 0.98 (0.72–1.33); <i>P</i> = 0.90      | 1.46 (1.10–1.92); <i>P</i> < 0.01  | 0.05                           |
|                                      | Improved water source (JMP definition) | Unimproved water source            | <i>P</i> assessing interaction |
| <b>Sensitivity analysis model 2*</b> |                                        |                                    |                                |
| Always handwash at school            | 0.58 (0.32–1.05); <i>P</i> = 0.07      | 4.38 (0.66–28.93); <i>P</i> = 0.12 | 0.04                           |
| Always handwash at home              | 0.82 (0.50–1.32); <i>P</i> = 0.41      | 1.15 (0.73–1.80); <i>P</i> = 0.54  | 0.29                           |
| <b>Sensitivity analysis model 3*</b> |                                        |                                    |                                |
| Last handwashed at school            | 0.70 (0.47–1.05); <i>P</i> = 0.08      | 1.20 (0.55–2.60); <i>P</i> = 0.65  | 0.22                           |
| Last handwashed at home              | 0.99 (0.72–1.34); <i>P</i> = 0.94      | 1.45 (1.11–1.92); <i>P</i> < 0.01  | 0.05                           |

CI = confidence interval; JMP = joint monitoring program; OR = odds ratio.

\*Models included handwashing × water interaction terms and controlled for all of the other water, sanitation, and hygiene (WaSH) variables and confounder variables.

†At many schools, improved school water sources did not reliably supply water throughout the year, so here we constrained the definition of an improved school water source to also require water reliability.
